# Supplementary material for: Natural Proteasome Inhibitor Celastrol Suppresses Androgen-Independent Prostate Cancer Progression by Modulating Apoptotic Proteins and NF-kappaB
Source: PubMed Central journal article supplement (PMC3000808; doi:10.1371/journal.pone.0014153), 2010-12-10
Supplement: pone.0014153.s001.pdf [file pone.0014153.s001.pdf]

## Supplemental Table S1.

**Table S1. Primers for real-time PCR (human)**

| <b>Gene</b> | <b>Length</b> | <b>Primer sequences (5' to 3')</b>                                        |
|-------------|---------------|---------------------------------------------------------------------------|
| TNF         | 107 bp        | Forward: CCAGGGACCTCTCTCTAATCAGC<br>Reverse: CTCAGCTTGAGGGTTTGCTACAA      |
| IL8         | 75 bp         | Forward: CGTGGCTCTCTTGGCAGC<br>Reverse: TCTTTAGCACTCCTTGGCAAAAC           |
| CXCL1       | 112 bp        | Forward: CTTGCCTCAATCCTGCATC<br>Reverse: CCTTCTGGTCAGTTGGATTTG            |
| c-Myc       | 72 bp         | Forward: GCCACGTCTCCACACATCAG<br>Reverse: TCTTGGCAGCAGGATAGTCCTT          |
| cyclin D1   | 75 bp         | Forward: CCGTCCATGCGGAAGATC<br>Reverse: GAAGACCTCCTCCTCGCACT              |
| ICAM-1      | 111 bp        | Forward: CAGGGGACCGTGGTCTGTT<br>Reverse: CATAGGTGACTGTGGGGTTCAA           |
| MMP-9       | 111 bp        | Forward: GAGGCGCTCATGTACCCTATGT<br>Reverse: CCGTGGCTCAGGTTTCAGG           |
| BIRC2       | 101 bp        | Forward: TGGATTTGTTGTTCTTTTCAGAAAG<br>Reverse: TTCGGCACCATAACTCTGATGA     |
| BIRC3       | 101 bp        | Forward: AACAAAACACCAGGGACACATTTTC<br>Reverse: AAACACCATGTCCCTAAAATGTCATT |
| BIRC5       | 65 bp         | Forward: TGCCTGGCAGCCCTTTC<br>Reverse: CCTCCAAGAAGGGCCAGTTC               |
| Bcl-2       | 76 bp         | Forward: CATGCTGGGGCCGTACAG<br>Reverse: GAACCGGCACCTGCACAC                |
| Bcl-xL      | 142 bp        | Forward: ATGGGGTAAACTGGGGTTCG<br>Reverse: GGCTCTAGGTGGTCATTCAGG           |
| GAPDH       | 73 bp         | Forward: TCCATGACAACCTTTGGTATCGTG<br>Reverse: ACAGTCTTCTGGGTGGCAGTG       |
